# Supplementary material for: Pancancer Analysis of the Oncogenic and Prognostic Role of NOL7: A Potential Target for Carcinogenesis and Survival
Source: MDPI journal article supplement (doi:10.3390/ijms23179611), 2022-08-25
Supplement: s1 [file s1]

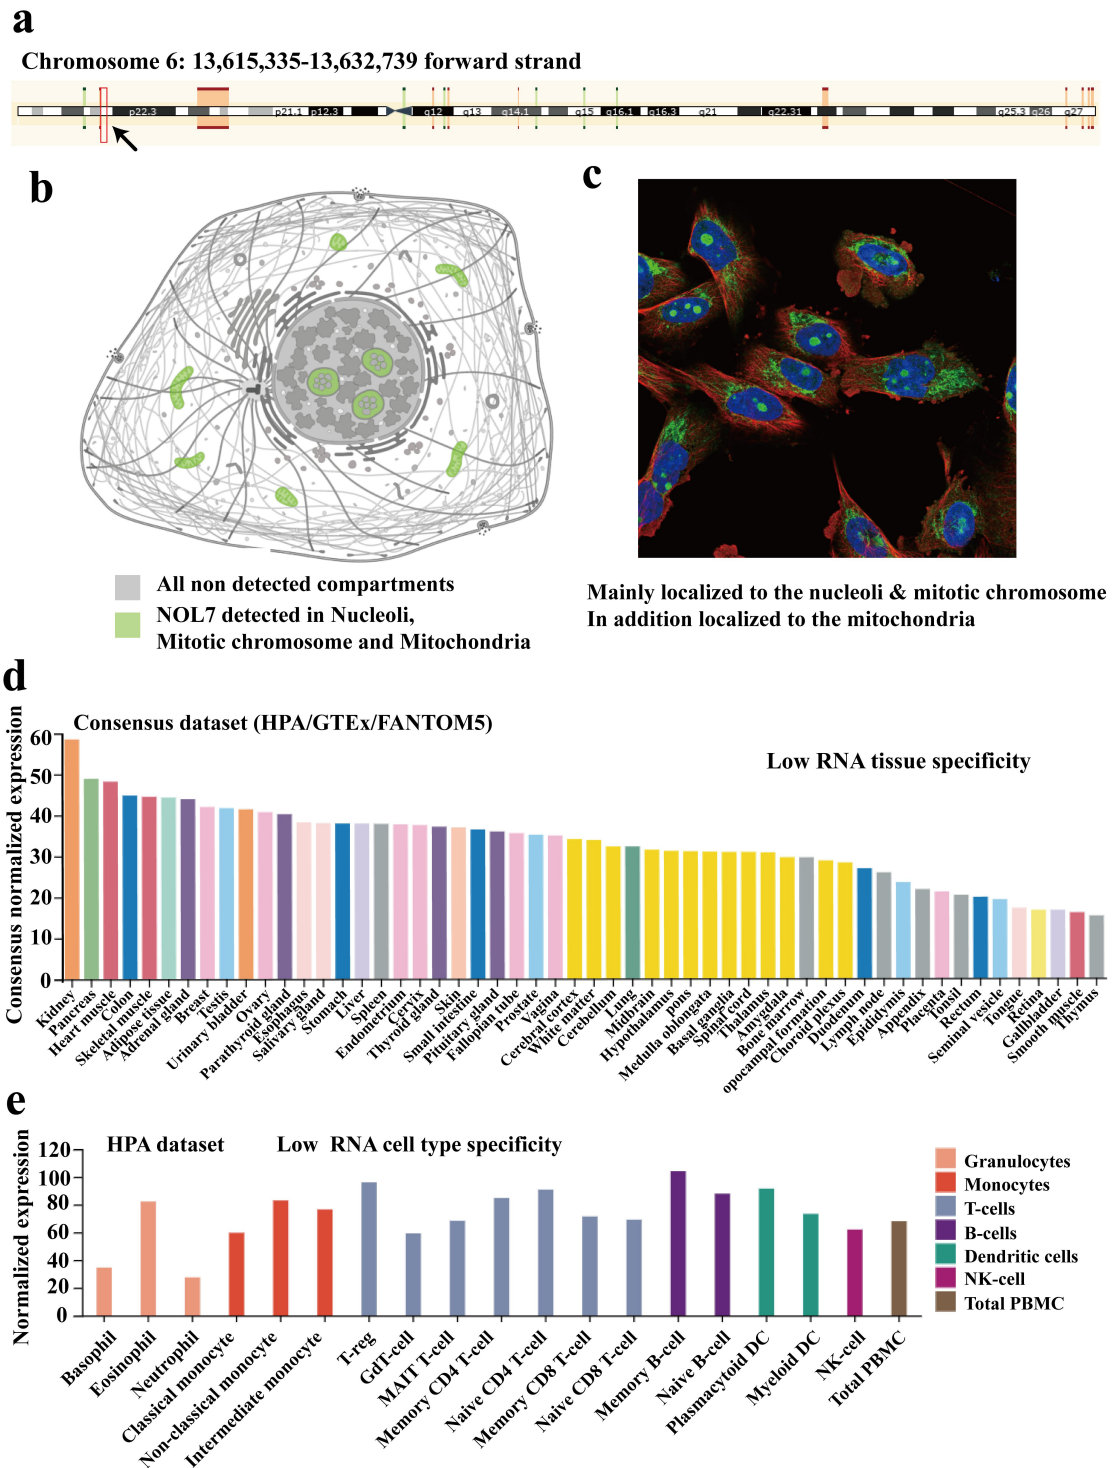

**Supplementary Figure S1.** Expression level of *NOL7* in different normal tissues and blood cells. **(a)** Genomic location of human *NOL7*. **(b-c)** Location of *NOL7* protein in eukaryocyte. **(d)** *NOL7* gene expression in different normal tissues using the consensus datasets of HPA, GTEx and FANTOM5. **(e)** *NOL7* gene expression in different normal blood cells using the consensus datasets of HPA, Monaco and Schmiedel.

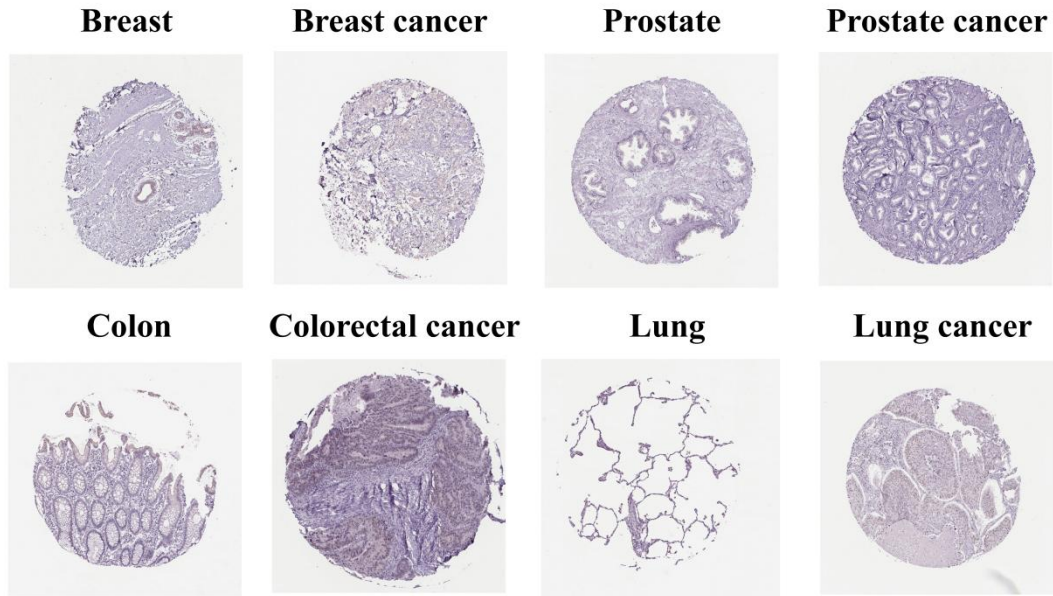

**Supplementary Figure S2.** Immunohistochemistry images of *NOL7* protein in tumor tissues including breast cancer, prostate cancer, colon cancer, and lung cancer, and corresponding normal tissues, obtained from HAP dataset.

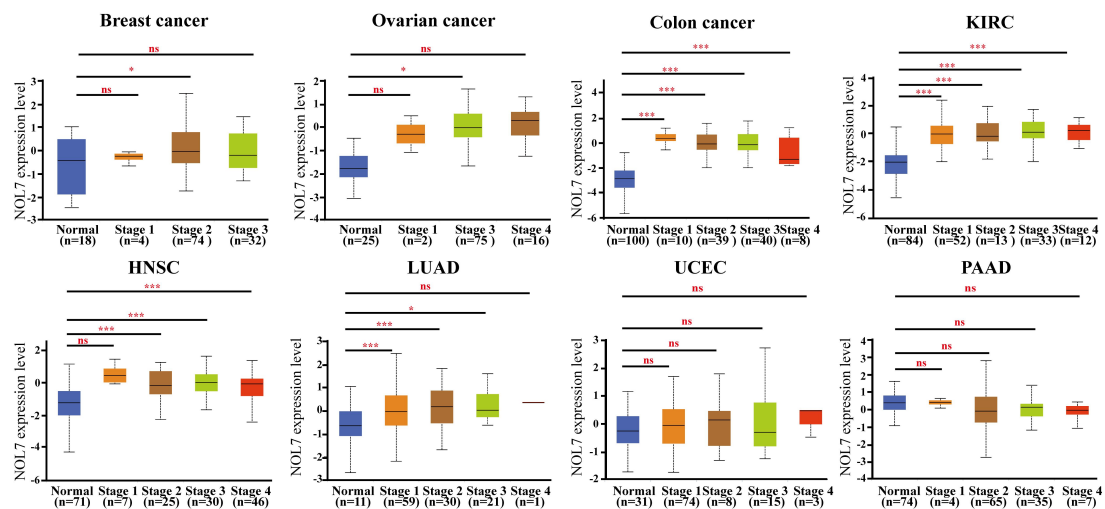

**Supplementary Figure S3.** Correlation between *NOL7* protein expression and clinicopathology of various cancer types including breast cancer, ovarian cancer, colon cancer, KIRC, HNSC, LUAD, UCEC, and PAAD. \*  $p < 0.05$ ; \*\*  $p < 0.01$ ; \*\*\*  $p < 0.001$ .

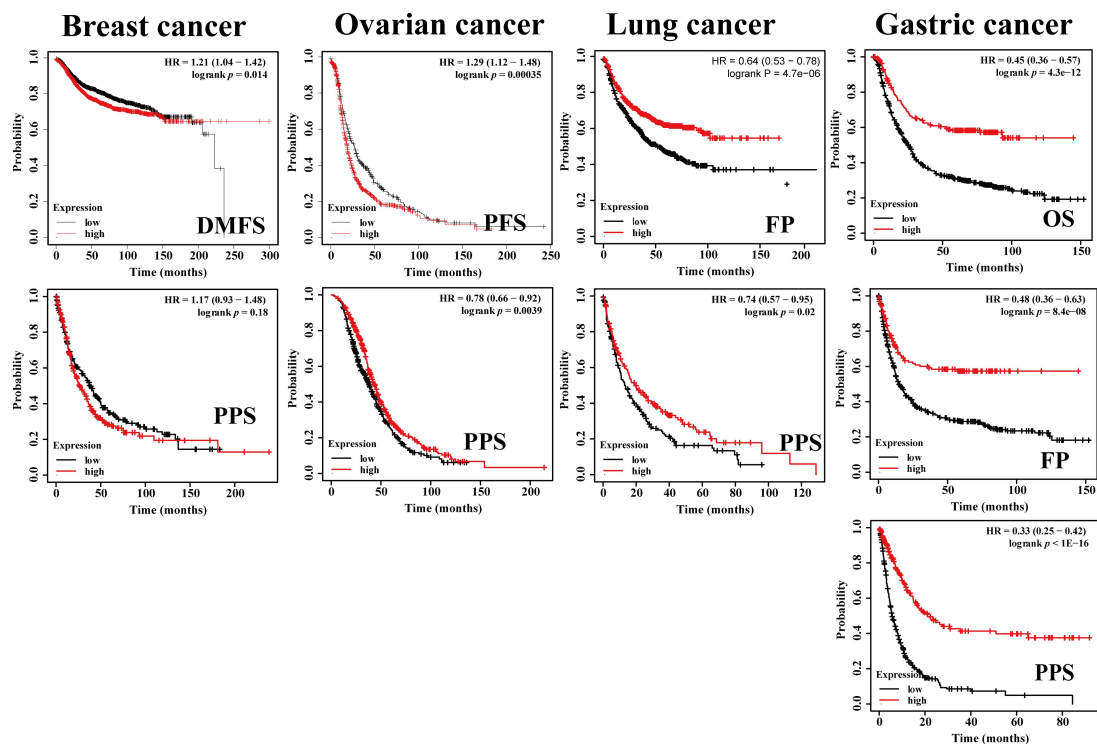

**Supplementary Figure S4.** Correlation between *NOL7* gene expression and survival prognosis of tumors in TCGA dataset, analyzed in Kaplan-Meier plotter. DMFS: distant metastasis free survival, PFS: progression free survival, FP: first progression, PPS: post progression survival post progression survival.

## a Overall survival

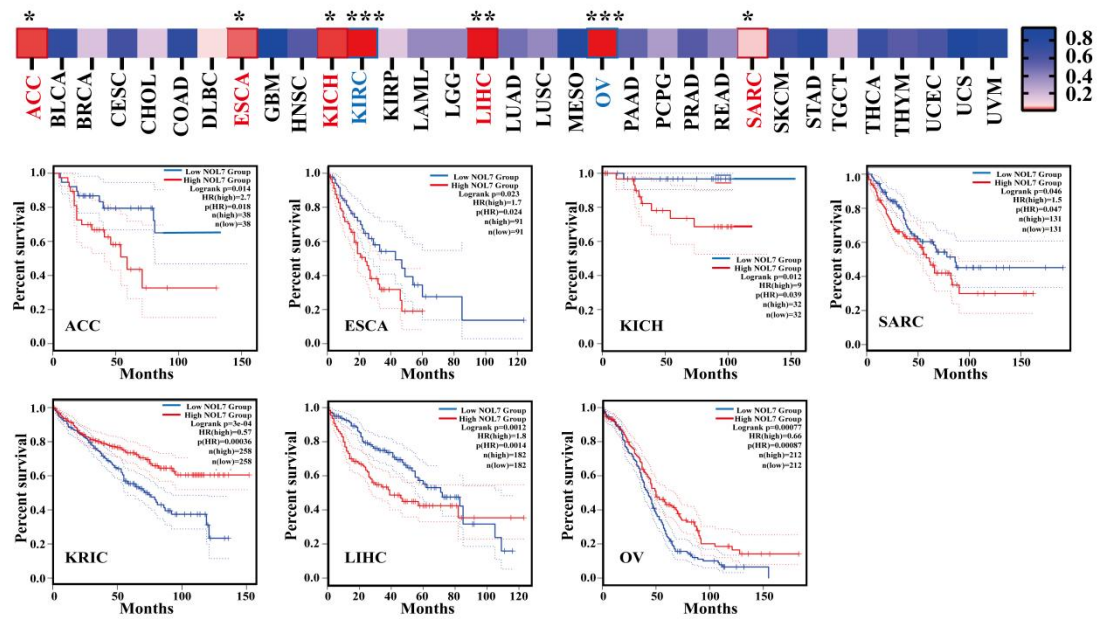

## b Disease free survival

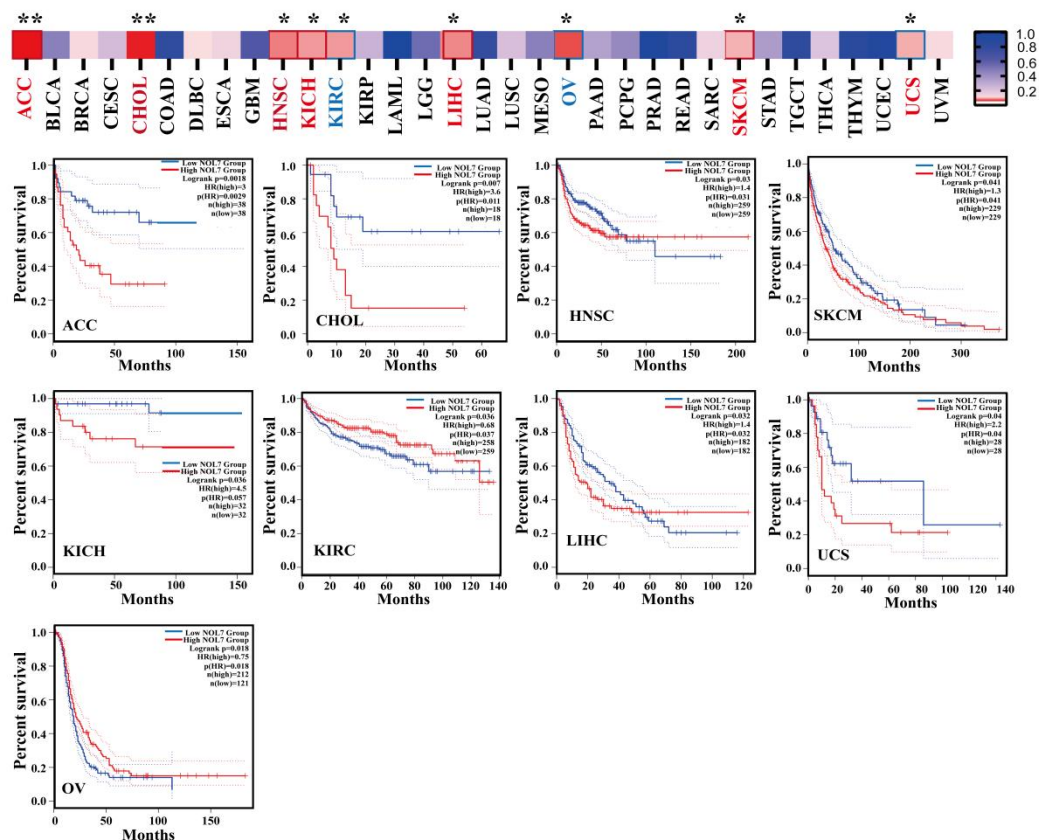

**Supplementary Figure S5.** Association between the *NOL7* expression and the OS (a) and DFS (b) of patients in different cancer types, as examined using GEPIA2. \*  $p < 0.05$ ; \*\*  $p < 0.01$ ; \*\*\*  $p < 0.001$ .

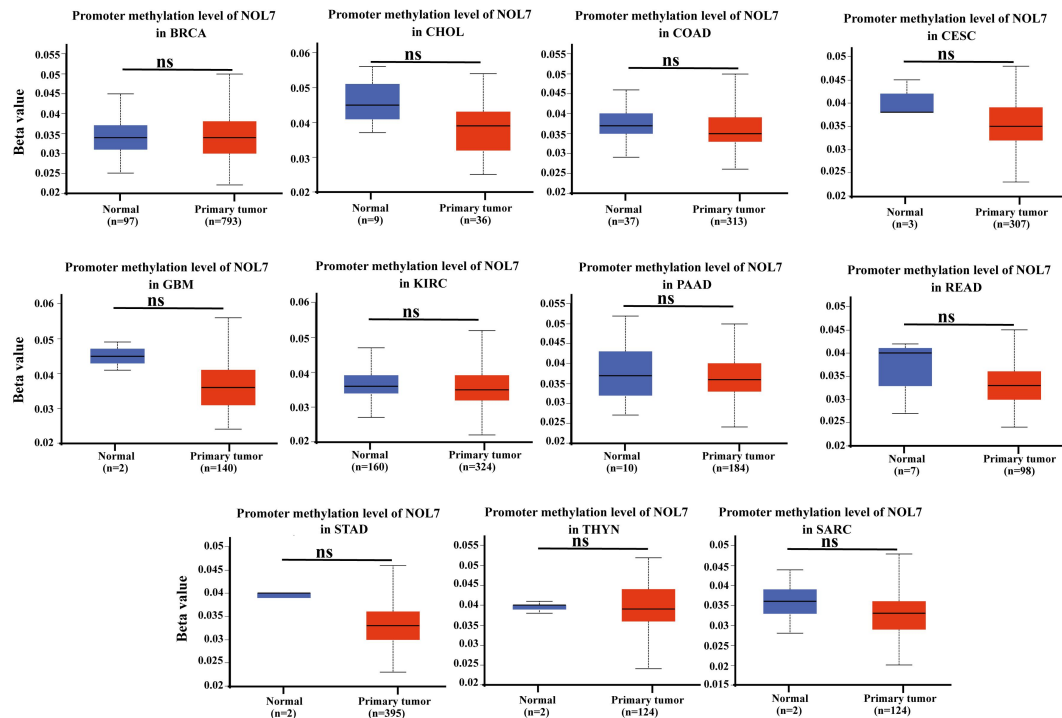

**Supplementary Figure S6.** No significant difference of promoter methylation level of NOL7 between primary tumors and normal tissues was observed in BRCA, CHOL, COAD, CESC, GBM, KIRC, PAAD, READ, STAD, and THYN. ns, No significance.







| Factor            | Subgroup                  | Sample size | OS   |          | RFS  |          | DMFS |          | PSS  |          |
|-------------------|---------------------------|-------------|------|----------|------|----------|------|----------|------|----------|
|                   |                           |             | HR   | <i>p</i> | HR   | <i>p</i> | HR   | <i>p</i> | HR   | <i>p</i> |
| ER status-IHC     | ER positive               | 3499        | 1.52 | 0.0082   | 1.35 | 0.00011  | 1.43 | 0.0094   | 1.51 | 0.028    |
|                   | ER negative               | 2168        | 0.71 | 0.05     | 0.97 | 0.8      | 0.86 | 0.27     | 1.11 | 0.68     |
| ER status-array   | ER positive               | 5526        | 1.2  | 0.12     | 1.46 | 9.1e-10  | 1.21 | 0.046    | 1.12 | 0.42     |
|                   | ER negative               | 2009        | 0.7  | 0.031    | 0.96 | 0.71     | 0.84 | 0.2      | 0.93 | 0.74     |
| TP53 status       | mutated                   | 272         | 0.7  | 0.32     | 0.68 | 0.12     | 0.51 | 0.083    | 0.99 | 0.98     |
|                   | Wild type                 | 388         | 0.84 | 0.59     | 1.07 | 0.76     | 1.44 | 0.32     | 0.83 | 0.59     |
| PR status         | PR positive               | 1559        | 2.53 | 0.022    | 1.2  | 0.006    | 1.31 | 0.24     | 1.85 | 0.25     |
|                   | PR negative               | 1989        | 0.81 | 0.39     | 1.13 | 0.29     | 0.87 | 0.36     | 0.55 | 0.25     |
| HER2 status       | HER2 positive             | 1273        | 1.27 | 0.19     | 1.26 | 0.037    | 1.1  | 0.59     | 1.16 | 0.51     |
|                   | HER2 negative             | 6262        | 1.19 | 0.12     | 1.49 | 6.1e-12  | 1.24 | 0.016    | 1.13 | 0.38     |
| Subtype-StGallen  | basal                     | 1494        | 0.57 | 0.0044   | 0.97 | 0.81     | 0.86 | 0.36     | 0.66 | 0.15     |
|                   | Luminal A                 | 3511        | 1.28 | 0.12     | 1.61 | 1.3e-08  | 1.22 | 0.13     | 1.17 | 0.38     |
|                   | Luminal B                 | 2015        | 1.23 | 0.25     | 1.42 | 8.9e-05  | 1.25 | 0.12     | 0.93 | 0.76     |
|                   | HER2+                     | 515         | 1.06 | 0.84     | 1.03 | 0.86     | 0.83 | 0.47     | 1.25 | 0.56     |
| Subtype - PAM50   | basal                     | 1671        | 0.79 | 0.23     | 1.19 | 0.11     | 0.96 | 0.77     | 0.6  | 0.072    |
|                   | Luminal A                 | 2470        | 1.38 | 0.13     | 1.43 | 0.00078  | 1.23 | 0.21     | 1.13 | 0.61     |
|                   | Luminal B                 | 2005        | 0.88 | 0.46     | 1.19 | 0.049    | 0.97 | 0.86     | 1.04 | 0.87     |
|                   | HER2+                     | 1080        | 0.93 | 0.73     | 1.1  | 0.45     | 1    | 1        | 1.16 | 0.55     |
|                   | normal                    | 309         | 0.83 | 0.71     | 1.29 | 0.46     | 0.8  | 0.64     | NA   | NA       |
| Lymph node status | Lymph node positive       | 2153        | 1.02 | 0.92     | 1.22 | 0.023    | 0.99 | 0.92     | 1.06 | 0.78     |
|                   | Lymph node negative       | 2829        | 1.33 | 0.096    | 1.32 | 0.00069  | 1.44 | 0.0033   | 1.43 | 0.083    |
| Grade             | Grade 1                   | 576         | 1.48 | 0.37     | 1.52 | 0.1      | 2.49 | 0.035    | 1.35 | 0.55     |
|                   | Grade 2                   | 1795        | 1.2  | 0.37     | 1.38 | 0.004    | 1.41 | 0.02     | 1.12 | 0.64     |
|                   | Grade 3                   | 2058        | 0.86 | 0.32     | 1.02 | 0.81     | 0.81 | 0.12     | 1.04 | 0.85     |
| Pletenpol subtype | Basal-like 1              | 418         | 0.44 | 0.045    | 1.18 | 0.45     | 0.88 | 0.65     | 0.4  | 0.17     |
|                   | Basal-like 2              | 165         | 0.42 | 0.1      | 0.93 | 0.82     | 0.92 | 0.82     | NA   | NA       |
|                   | immunomodulatory          | 462         | 0.58 | 0.21     | 0.93 | 0.74     | 0.92 | 0.76     | 0.98 | 0.98     |
|                   | mesenchymal               | 382         | 0.94 | 0.86     | 1.03 | 0.9      | 0.75 | 0.35     | 0.75 | 0.52     |
|                   | Mesenchymal stem-like     | 201         | 0.82 | 0.71     | 0.57 | 0.12     | 0.47 | 0.16     | NA   | NA       |
|                   | Luminal androgen receptor | 413         | 0.95 | 0.87     | 0.98 | 0.91     | 0.82 | 0.51     | 0.75 | 1.15     |

**Table S1. Subgroup analysis on the correlation of NOL7 expression and prognosis of breast cancer cases.**

HR, hazard ratio; OS, overall survival; RFS,relapse free survival; DMFS, distant metastasis free survival;

ER, Estrogen receptor; PR, Progesterone receptor; HER2, human epidermal growth factor receptor-2

TP53,Tumor Protein P53; NA, not available data; *p* value less than 0.05 is shown in red.



| Factor                 | Subgroup                       | Sample size | OS   |          | FP   |          | PPS  |          |
|------------------------|--------------------------------|-------------|------|----------|------|----------|------|----------|
|                        |                                |             | HR   | <i>p</i> | HR   | <i>p</i> | HR   | <i>p</i> |
| <b>Histology</b>       | adenocarcinoma                 | 865         | 0.64 | 0.00015  | 0.78 | 0.11     | 0.64 | 0.058    |
|                        | Squamous cell carcinoma        | 675         | 1.13 | 0.33     | 0.88 | 0.64     | 0.66 | 0.43     |
| <b>gender</b>          | female                         | 817         | 0.82 | 0.1      | 0.64 | 0.0022   | 0.76 | 0.15     |
|                        | male                           | 1387        | 0.9  | 0.21     | 0.64 | 7e-04    | 0.7  | 0.0412   |
| <b>Smoking history</b> | Exclude those never smoked     | 970         | 0.81 | 0.045    | 0.81 | 0.093    | 0.75 | 0.054    |
|                        | Only those never smoked        | 247         | 0.33 | 0.00029  | 0.52 | 0.008    | 0.51 | 0.035    |
| <b>Stage</b>           | Stage I                        | 652         | 0.84 | 0.22     | 0.86 | 0.49     | 0.69 | 0.22     |
|                        | Stage II                       | 320         | 0.69 | 0.044    | 0.98 | 0.94     | 0.46 | 0.019    |
|                        | Stage III                      | 70          | 1.49 | 0.15     | NA   | NA       | NA   | NA       |
| <b>grade</b>           | Grade I                        | 202         | 0.81 | 0.27     | 0.88 | 0.55     | 0.98 | 0.93     |
|                        | Grade II                       | 310         | 0.9  | 0.5      | 1.34 | 0.17     | 1.16 | 0.54     |
|                        | Grade III                      | 77          | 1.15 | 0.68     | 1.42 | 0.39     | 0.8  | 0.68     |
| <b>AJCC stage t</b>    | T1                             | 475         | 1.1  | 0.5      | 1.57 | 0.085    | 1.01 | 0.97     |
|                        | T2                             | 686         | 0.98 | 0.89     | 0.8  | 0.15     | 0.96 | 0.8      |
|                        | T3                             | 99          | 0.96 | 0.88     | 1.13 | 0.8      | NA   | NA       |
|                        | T4                             | 48          | 1.29 | 0.44     | NA   | NA       | NA   | NA       |
| <b>AJCC stage n</b>    | N0                             | 863         | 1.1  | 0.39     | 1.15 | 0.39     | 0.99 | 0.95     |
|                        | N1                             | 296         | 1.05 | 0.75     | 0.86 | 0.53     | 0.98 | 0.93     |
|                        | N2                             | 113         | 0.97 | 0.89     | 1.88 | 0.065    | 1.13 | 0.74     |
| <b>AJCC stage m</b>    | N0                             | 818         | 1.17 | 0.13     | 0.8  | 0.39     | 0.78 | 0.43     |
| <b>surgery</b>         | Only surgical margins negative | 730         | 0.59 | 1e-05    | 0.46 | 1.8e-09  | 0.83 | 0.22     |
| <b>radiotherapy</b>    | NO                             | 276         | 0.98 | 0.92     | 1.35 | 0.12     | 1.11 | 0.65     |
|                        | YES                            | 73          | 0.83 | 0.5      | 1.03 | 0.92     | 0.83 | 0.53     |
| <b>chemotherapy</b>    | NO                             | 317         | 0.93 | 0.67     | 1.39 | 0.1      | 1.1  | 0.68     |
|                        | YES                            | 178         | 0.7  | 0.099    | 0.93 | 0.74     | 0.66 | 0.087    |

**Table S2. Subgroup analysis on the correlation of NOL7 expression and prognosis of lung cancer cases.**

HR, hazard ratio; OS, overall survival; RFS, relapse free survival; AJCC, American Joint Committee on Cancer; FP, first progression; PPS, post progression survival; NA, not available data; *p* value less than 0.05 is shown in red.

| Factor        | Subgroup        | Sample size | OS   |          | PFS  |          | PPS  |          |
|---------------|-----------------|-------------|------|----------|------|----------|------|----------|
|               |                 |             | HR   | <i>p</i> | HR   | <i>p</i> | HR   | <i>p</i> |
| Histology     | Endometrioid    | 62          | 5.77 | 0.076    | 5.77 | 0.00068  | NA   | NA       |
|               | Serous          | 1232        | 0.88 | 0.12     | 0.69 | 7.1e-07  | 0.77 | 0.0039   |
| Stage         | Stage 1         | 107         | 5.17 | 0.0018   | 4.49 | 0.012    | NA   | NA       |
|               | Stage 2         | 72          | 2.74 | 0.081    | 1.83 | 0.087    | 2.88 | 0.1      |
|               | Stage 3         | 1079        | 1.14 | 0.13     | 0.65 | 5.3e-08  | 0.79 | 0.012    |
|               | Stage 4         | 189         | 0.73 | 0.093    | 0.55 | 0.017    | 0.39 | 0.00017  |
| Grade         | Grade 1         | 56          | 1.59 | 0.32     | 2.79 | 0.055    | NA   | NA       |
|               | Grade 2         | 325         | 1.15 | 0.4      | 0.64 | 0.0078   | 0.72 | 0.085    |
|               | Grade 3         | 1024        | 0.88 | 0.14     | 0.73 | 0.00022  | 0.71 | 0.00074  |
|               | Grade 4         | 21          | 0.6  | 0.31     | NA   | NA       | NA   | NA       |
| TP53 mutation | Mutated         | 516         | 0.68 | 0.0011   | 0.59 | 4.7e-06  | 0.61 | 0.00017  |
|               | Wild type       | 102         | 0.72 | 0.25     | 0.7  | 0.17     | 0.64 | 0.14     |
| Debulk        | optimal         | 802         | 1.55 | 2.4e-05  | 1.62 | 4.9e-06  | 0.78 | 0.0039   |
|               | suboptimal      | 536         | 0.84 | 0.096    | 1.3  | 0.021    | 0.66 | 0.002    |
| Chemotherapy  | Contains platin | 1438        | 0.91 | 0.22     | 1.28 | 0.00062  | 0.75 | 0.0013   |
|               | Contains Taxol  | 821         | 1.14 | 0.22     | 0.72 | 0.00039  | 0.84 | 0.12     |
|               | Contains        | 804         | 1.14 | 0.22     | 0.73 | 0.00057  | 0.83 | 0.11     |
|               | Taxol+platin    |             |      |          |      |          |      |          |
|               | Contains        | 50          | 2.6  | 0.039    | 0.44 | 0.024    | 2.58 | 0.044    |
|               | Avastin         |             |      |          |      |          |      |          |
|               | Contains        | 108         | 0.55 | 0.08     | 0.78 | 0.41     | 1.19 | 0.56     |
|               | Docetaxel       |             |      |          |      |          |      |          |
|               | Contains        | 135         | 1.36 | 0.17     | 0.61 | 0.021    | 0.81 | 0.34     |
|               | Gemcitabine     |             |      |          |      |          |      |          |
|               | Contains        | 248         | 0.71 | 0.13     | 0.81 | 0.22     | 0.66 | 0.15     |
|               | Paclitaxel      |             |      |          |      |          |      |          |
|               | Contains        | 119         | 1.57 | 0.034    | 0.78 | 0.29     | 1.39 | 0.11     |
|               | Topotecan       |             |      |          |      |          |      |          |

**Table S3. Subgroup analysis on the correlation of NOL7 expression and prognosis of ovarian cancer cases.**

HR, hazard ratio; OS, overall survival; PFS, progress free survival; PPS, post progression survival; TP53, Tumor Protein P53; NA, not available data; *p* value less than 0.05 is shown in red.

| Factor                | Subgroup            | Sample size | OS   |          | FP   |          | PPS  |          |
|-----------------------|---------------------|-------------|------|----------|------|----------|------|----------|
|                       |                     |             | HR   | <i>p</i> | HR   | <i>p</i> | HR   | <i>p</i> |
| Gender                | Female              | 244         | 0.41 | 8.8e-05  | 0.51 | 0.0032   | 0.31 | 8.5e-07  |
|                       | Male                | 566         | 0.48 | 2e-09    | 0.43 | 2.4e-07  | 0.36 | 8.2e-14  |
| Stage                 | Stage 1             | 69          | 0    | 0.0035   | 0    | 0.0085   | 0.08 | 0.00022  |
|                       | Stage 2             | 145         | 0.67 | 0.2      | 1.34 | 0.34     | 0.42 | 0.011    |
|                       | Stage 3             | 319         | 0.49 | 6e-05    | 0.6  | 0.0082   | 0.32 | 1.1e-05  |
|                       | Stage 4             | 152         | 0.56 | 0.013    | 0.51 | 0.0072   | 0.48 | 0.002    |
| Stage t               | t2                  | 253         | 0.63 | 0.035    | 0.66 | 0.067    | 0.41 | 6.5e-05  |
|                       | t3                  | 208         | 0.68 | 0.034    | 0.75 | 0.12     | 0.44 | 0.00037  |
|                       | t4                  | 39          | 0.33 | 0.017    | 0.32 | 0.011    | 0.44 | 0.11     |
| Stage n               | n0                  | 76          | 0    | 0.0015   | 0    | 0.0014   | 0.12 | 0.00022  |
|                       | n1                  | 232         | 0.41 | 0.00014  | 0.53 | 0.0017   | 0.27 | 4e-08    |
|                       | n2                  | 129         | 0.48 | 0.0041   | 0.65 | 0.05     | 0.38 | 2e-04    |
|                       | n3                  | 76          | 0.57 | 0.065    | 0.52 | 0.024    | 0.64 | 0.13     |
| Stage m               | m0                  | 459         | 0.53 | 3.3e-05  | 0.53 | 4e-04    | 0.35 | 1.6e-11  |
|                       | m1                  | 58          | 0.39 | 0.0021   | 0.49 | 0.039    | 0.35 | 0.012    |
| HER2                  | negative            | 641         | 0.48 | 1.3e-09  | 0.56 | 1.1e-05  | 0.33 | 1.1e-13  |
|                       | positive            | 424         | 0.84 | 0.19     | 0.65 | 0.0082   | 0.43 | 8.7e-05  |
| Lauren classification | Intestinal          | 336         | 0.45 | 7e-07    | 0.51 | 0.0012   | 0.31 | 3.3e-08  |
|                       | Diffuse             | 248         | 0.61 | 0.0054   | 0.65 | 0.016    | 0.48 | 0.00041  |
|                       | Mixed               | 33          | 0.34 | 0.052    | 0.31 | 0.038    | NA   | NA       |
| Differentiation       | Poorly              | 166         | 1.31 | 0.24     | 1.73 | 0.03     | 1.33 | 0.38     |
|                       | Moderately          | 67          | 0.5  | 0.034    | 0.48 | 0.02     | 2.21 | 0.12     |
|                       | Well                | 32          | 0.49 | 0.1      | NA   | NA       | NA   | NA       |
| Treatment             | Surgery alone       | 393         | 0.65 | 0.0078   | 0.73 | 0.08     | 0.4  | 8.2e-09  |
|                       | 5-Fu based adjuvant | 157         | 1.72 | 0.0038   | 1.99 | 0.00019  | 1.28 | 0.19     |
| Perforation           | No                  | 169         | 0.7  | 0.08     | 0.65 | 0.027    | 1.9  | 0.03     |

**Table S4. Subgroup analysis on the correlation of NOL7 expression and prognosis of gastric cancer cases.**

HR, hazard ratio; OS, overall survival; FP, first progression; PPS, post progression survival;

HER2, human epidermal growth factor receptor-2; NA, not available data; *p* value less than 0.05 is shown in red.

| Factor              | Subgroup | Sample size | OS   |          | PFS  |          | RFS  |          | DSS  |          |
|---------------------|----------|-------------|------|----------|------|----------|------|----------|------|----------|
|                     |          |             | HR   | <i>P</i> | HR   | <i>P</i> | HR   | <i>P</i> | HR   | <i>P</i> |
| Stage               | Stage 1  | 171         | 1.72 | 0.084    | 0.77 | 0.31     | 0.78 | 0.39     | 2.33 | 0.059    |
|                     | Stage 2  | 86          | 0.62 | 0.24     | 0.69 | 0.29     | 1.19 | 0.6      | 2.01 | 0.24     |
|                     | Stage 3  | 85          | 1.49 | 0.23     | 2.11 | 0.013    | 2.22 | 0.021    | 1.73 | 0.14     |
| Grade               | Grade 1  | 55          | 2.2  | 0.21     | 3.13 | 0.0029   | 3.3  | 0.012    | 0.55 | 0.34     |
|                     | Grade 2  | 177         | 0.71 | 0.2      | 1.39 | 0.21     | 1.25 | 0.45     | 1.83 | 0.067    |
|                     | Grade 3  | 122         | 1.79 | 0.065    | 0.6  | 0.06     | 0.54 | 0.037    | 2.04 | 0.14     |
| AJCC_T              | T1       | 181         | 1.83 | 0.043    | 0.85 | 0.51     | 1.25 | 0.41     | 2.49 | 0.026    |
|                     | T2       | 94          | 0.56 | 0.12     | 0.78 | 0.39     | 1.2  | 0.56     | 0.62 | 0.39     |
|                     | T3       | 80          | 1.73 | 0.1      | 1.83 | 0.054    | 1.94 | 0.065    | 1.78 | 0.15     |
| Gender              | Female   | 121         | 1.7  | 0.076    | 1.69 | 0.043    | 2.07 | 0.014    | 2.03 | 0.066    |
|                     | Male     | 250         | 1.34 | 0.27     | 1.27 | 0.22     | 0.81 | 0.34     | 1.5  | 0.16     |
| Vascular invasion   | None     | 205         | 1.34 | 0.29     | 1.25 | 0.35     | 1.27 | 0.35     | 1.88 | 0.092    |
|                     | micro    | 93          | 0.45 | 0.038    | 1.88 | 0.12     | 2.23 | 0.087    | 2.39 | 0.11     |
| Race                | White    | 184         | 1.92 | 0.027    | 1.88 | 0.0018   | 1.98 | 0.0035   | 1.95 | 0.026    |
|                     | Asian    | 158         | 1.41 | 0.26     | 0.68 | 0.13     | 0.62 | 0.084    | 1.65 | 0.21     |
| Sorafenib treatment | treated  | 30          | 3.22 | 0.036    | 2.18 | 0.05     | 1.74 | 0.24     | 3.22 | 0.036    |
| Alcohol consumption | Yes      | 117         | 1.75 | 0.1      | 1.43 | 0.25     | 0.77 | 0.45     | 1.78 | 0.12     |
|                     | none     | 205         | 1.39 | 0.18     | 1.49 | 0.87     | 1.6  | 0.066    | 1.87 | 0.044    |
| Hepatitis virus     | Yes      | 153         | 1.42 | 0.3      | 0.59 | 0.025    | 0.59 | 0.036    | 0.7  | 0.4      |
|                     | none     | 169         | 1.57 | 0.051    | 1.92 | 0.0067   | 2.05 | 0.0048   | 2.41 | 0.0017   |

**Table S5. Subgroup analysis on the correlation of NOL7 expression and prognosis of liver cancer cases.**

HR, hazard ratio; AJCC, American Joint Committee on Cancer; OS, overall survival; PFS, progress free survival; RFS, relapse free survival; DSS, disease specific survival; NA, not available data; *p* value less than 0.05 is shown in red.
